# Supplementary material for: Discovery of lipid biomarkers correlated with disease progression in clear cell renal cell carcinoma using desorption electrospray ionization imaging mass spectrometry
Source: PubMed Central journal article supplement (PMC6422196; doi:10.18632/oncotarget.26706), 2019-03-01
Supplement: oncotarget-10-1688-s001.pdf [file oncotarget-10-1688-s001.pdf]

## Discovery of lipid biomarkers correlated with disease progression in clear cell renal cell carcinoma using desorption electrospray ionization imaging mass spectrometry

### SUPPLEMENTARY MATERIALS

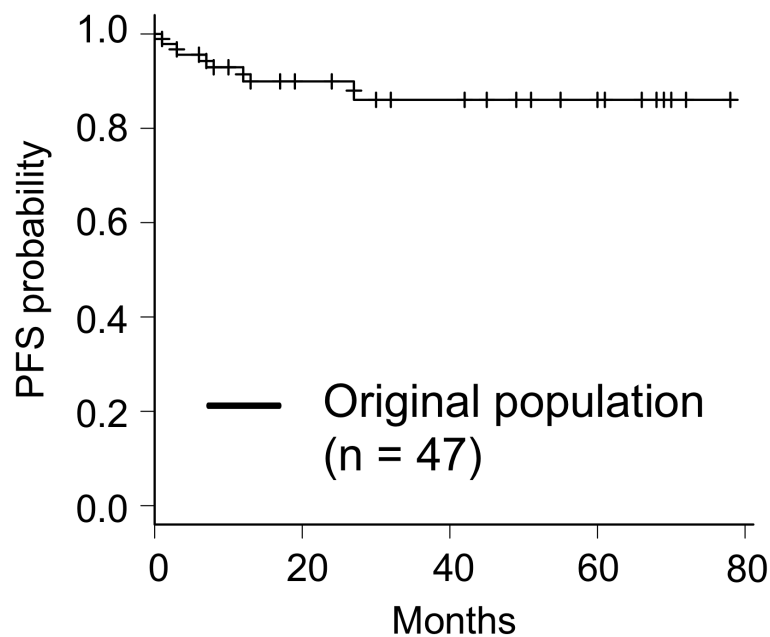

**Supplementary Figure 1: Kaplan–Meier survival curve of PFS for original population.** This survival curve shows observed period (months) (x-axis) and progression-free survival probability (y-axis) in all patients.

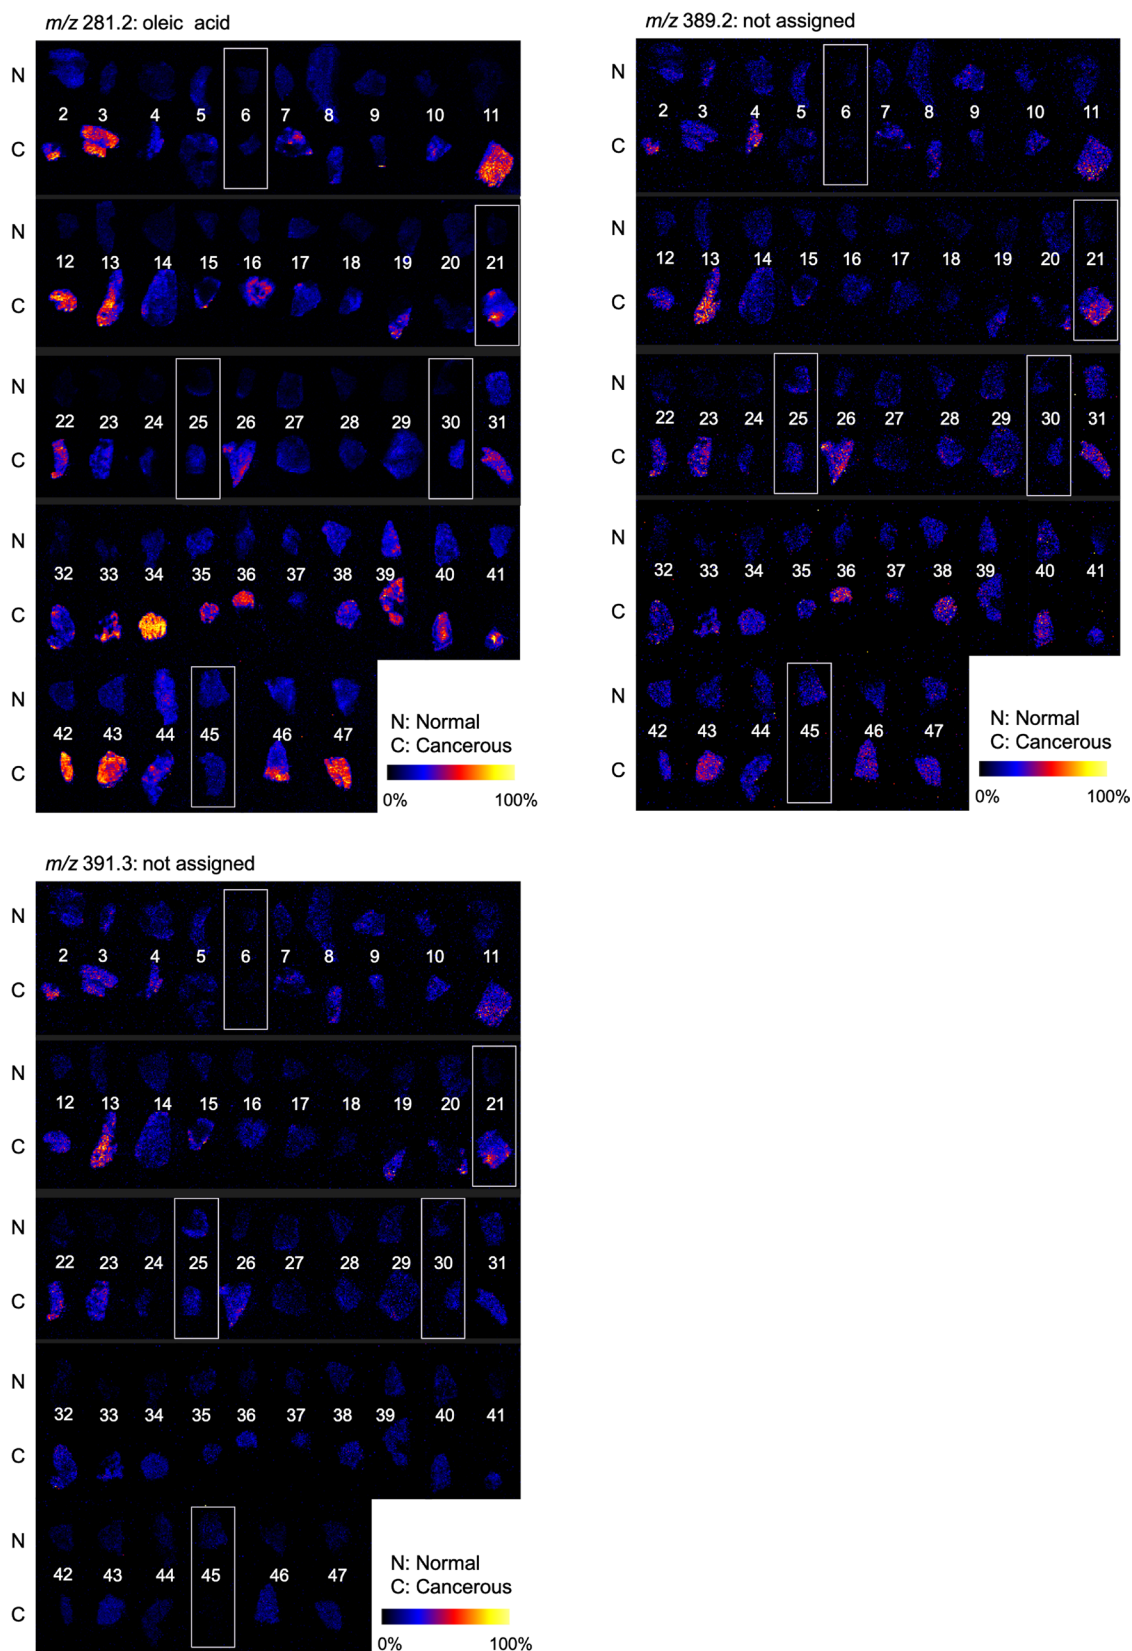

**Supplementary Figure 2: Images showing ions of  $m/z$  281.2 (oleic acid), 389.2 (not assigned), and 391.3 (not assigned) identified as biomarkers using DESI-IMS data from all samples except No. 1. Images for sample No. 1 by DESI-IMS were shown as representative images in the main article. High to low ion intensity was shown on a scale from white to black, respectively. Most cancerous areas were colored in red or blue as compared to normal areas. The samples surrounded with a square box were obtained from patients who showed disease progression.**

**Supplementary Table 1: LC-MS/MS data used for identification of glycerophospholipids**

| Observed mass | Theoretical mass | Delta (Da) | Fragment ions                                  | Ion assignments | Elemental Formula                                              |
|---------------|------------------|------------|------------------------------------------------|-----------------|----------------------------------------------------------------|
| 773.5341      | 773.5338         | 0.0009     | 152.00, 281.25                                 | PG(18:1/18:1)   | C <sub>42</sub> H <sub>78</sub> O <sub>10</sub> P <sup>-</sup> |
| 885.5493      | 885.5499         | 0.0009     | 152.00, 241.01, 259.02, 259.24, 259.24, 283.26 | PI(18:0/20:4)   | C <sub>47</sub> H <sub>82</sub> O <sub>13</sub> P <sup>-</sup> |

Two important two glycerophospholipids in this study were identified by LC-MS/MS. PG = glycerophosphoglycerol, PI = glycerophosphoinositol.

**Supplementary Table 2: Searching a computationally-generated database of lipid classes**

| Input mass | Matched mass | Delta (Da) | Name               | Elemental formula                                           |
|------------|--------------|------------|--------------------|-------------------------------------------------------------|
| 253.2174   | 253.2173     | 0.0001     | FA(16:1)           | C <sub>16</sub> H <sub>29</sub> O <sub>2</sub> <sup>-</sup> |
| 255.2330   | 255.2330     | 0.0000     | FA(16:0)           | C <sub>16</sub> H <sub>31</sub> O <sub>2</sub> <sup>-</sup> |
| 279.2330   | 279.2330     | 0.0000     | FA(18:2)           | C <sub>18</sub> H <sub>31</sub> O <sub>2</sub> <sup>-</sup> |
| 281.2486   | 281.2486     | 0.0000     | FA(18:1)           | C <sub>18</sub> H <sub>33</sub> O <sub>2</sub> <sup>-</sup> |
| 303.2329   | 303.2330     | 0.0001     | FA(20:4)           | C <sub>20</sub> H <sub>31</sub> O <sub>2</sub> <sup>-</sup> |
| 309.2799   | 309.2799     | 0.0000     | FA(20:1)           | C <sub>20</sub> H <sub>37</sub> O <sub>2</sub> <sup>-</sup> |
| 327.2333   | 327.2330     | 0.0003     | FA(22:6)           | C <sub>22</sub> H <sub>31</sub> O <sub>2</sub> <sup>-</sup> |
| 329.2476   | 329.2486     | 0.0010     | FA(22:5)           | C <sub>22</sub> H <sub>33</sub> O <sub>2</sub> <sup>-</sup> |
| 389.2462   | 389.2545     | 0.0083     | FA(20:0(OH4,Ep))   | C <sub>27</sub> H <sub>37</sub> O <sub>7</sub> <sup>-</sup> |
|            | 389.2545     | 0.0083     | FA(20:0(OH4,Ke))   | C <sub>27</sub> H <sub>37</sub> O <sub>7</sub> <sup>-</sup> |
| 391.2586   | 391.2490     | 0.0096     | FA(23:2(Ke2,Ep))   | C <sub>23</sub> H <sub>35</sub> O <sub>5</sub> <sup>-</sup> |
|            | 391.2490     | 0.0096     | FA(23:2(Ke,Ep2))   | C <sub>23</sub> H <sub>35</sub> O <sub>5</sub> <sup>-</sup> |
|            | 391.2490     | 0.0096     | FA(23:3(OH,Ep2))   | C <sub>23</sub> H <sub>35</sub> O <sub>5</sub> <sup>-</sup> |
|            | 391.2490     | 0.0096     | FA(23:3(OH,Ke2))   | C <sub>23</sub> H <sub>35</sub> O <sub>5</sub> <sup>-</sup> |
|            | 391.2490     | 0.0096     | FA(23:3(OH,Ke,Ep)) | C <sub>23</sub> H <sub>35</sub> O <sub>5</sub> <sup>-</sup> |
|            | 391.2490     | 0.0096     | FA(23:4(OH2,Ep))   | C <sub>23</sub> H <sub>35</sub> O <sub>5</sub> <sup>-</sup> |
|            | 391.2490     | 0.0096     | FA(23:4(OH2,Ke))   | C <sub>23</sub> H <sub>35</sub> O <sub>5</sub> <sup>-</sup> |
|            | 391.2490     | 0.0096     | FA(23:5(OH3))      | C <sub>23</sub> H <sub>35</sub> O <sub>5</sub> <sup>-</sup> |

Each input mass is measured mass from mass lock correction described in the main text. The ion of  $m/z$  187.0976 did not have any hit on this database search. FA = fatty acid. FA(16:1): palmitoleic acid, FA(16:0): palmitic acid, FA(18:2): linoleic acid, FA(18:1): oleic acid, FA(20:4): arachidonic acid, FA(22:6): docosahexaenoic acid (DHA), FA(22:5): docosapentaenoic acid (DPA).

**Supplementary Table 3: Searching LIPID MAPS structure database (LMSD)**

| <b>Input mass</b> | <b>Matched mass</b> | <b>Delta (Da)</b> | <b>Name</b>                                                              | <b>Elemental formula</b>                                    |
|-------------------|---------------------|-------------------|--------------------------------------------------------------------------|-------------------------------------------------------------|
| 187.0976          | 187.0976            | 0.0000            | Azelaic acid                                                             | C <sub>9</sub> H <sub>15</sub> O <sub>4</sub> <sup>-</sup>  |
| 187.0976          | 187.0976            | 0.0000            | cis- and trans-Ethyl 2,4-dimethyl-1,3-dioxolane-2-acetate                | C <sub>9</sub> H <sub>15</sub> O <sub>4</sub> <sup>-</sup>  |
| 187.0976          | 187.0976            | 0.0000            | (+/-)-Ethyl 3-acetoxy-2-methylbutyrate                                   | C <sub>9</sub> H <sub>15</sub> O <sub>4</sub> <sup>-</sup>  |
| 187.0976          | 187.0976            | 0.0000            | (+/-)-Methyl 5-acetoxyhexanoate                                          | C <sub>9</sub> H <sub>15</sub> O <sub>4</sub> <sup>-</sup>  |
| 187.0976          | 187.0977            | 0.0001            | 3-Methylsubericacid                                                      | C <sub>9</sub> H <sub>15</sub> O <sub>4</sub> <sup>-</sup>  |
| 391.2586          | 391.2643            | 0.0057            | 5-((3Z,6Z,9Z,12Z,15Z,18Z)-henicosa-3,6,9,12,15,18-hexaen-1-yl)resorcinol | C <sub>27</sub> H <sub>35</sub> O <sub>2</sub> <sup>-</sup> |

This search focused on *m/z* 187.0976, 389.2462, and 391.2586, which could not be identified using a computationally-generated database of lipid classes. The ion of *m/z* 389.2462 did not have any hit on LMSD search.
